# Supplementary material
Source: Springer Nature journal article supplement (https://www.springermedizin.de/resource/supplementary/10194_2012_253_MOESM2_ESM.pdf/9422632)

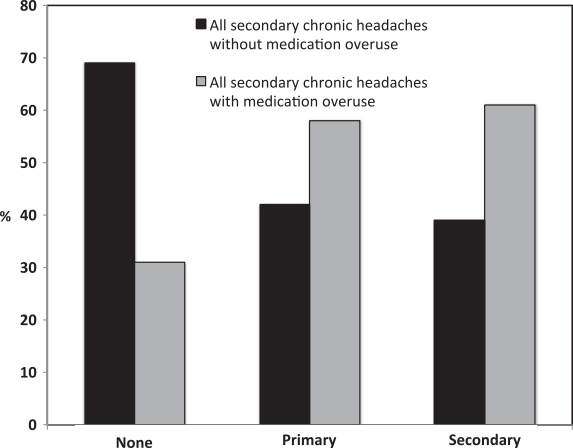

Supplement: MOESM2 [file 9422632]
